# Supplementary material for: Rare tetranuclear mixed-valent [MnII2MnIV2] clusters as building blocks for extended networks
Source: Royal Society of Chemistry journal article supplement (doi:10.1039/b804897e), 2008-01-01
Supplement: b804897e.pdf [file b804897e.pdf]

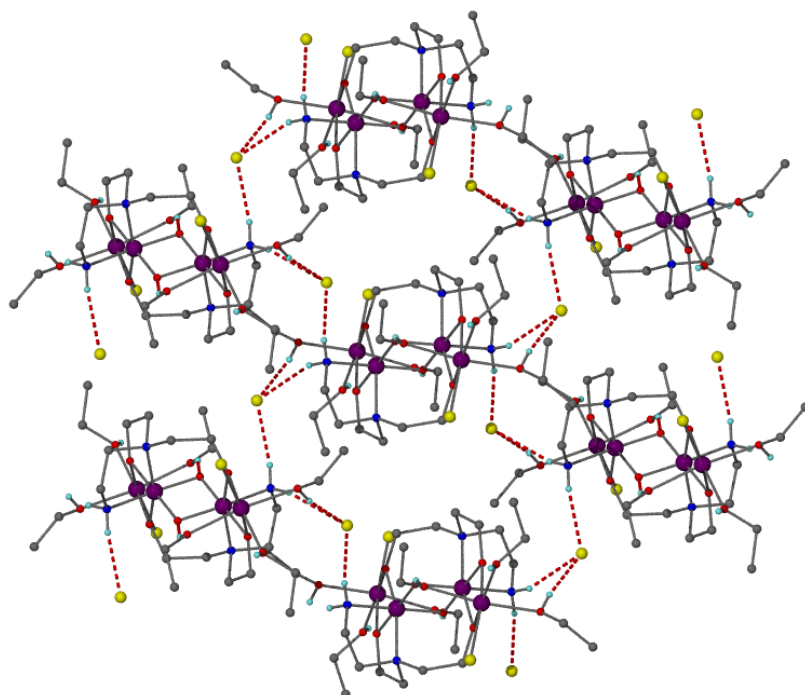

Fig. S1. The H-bonded layer in **1** running parallel to the *bc* plane. Most hydrogen atoms have been omitted for clarity.

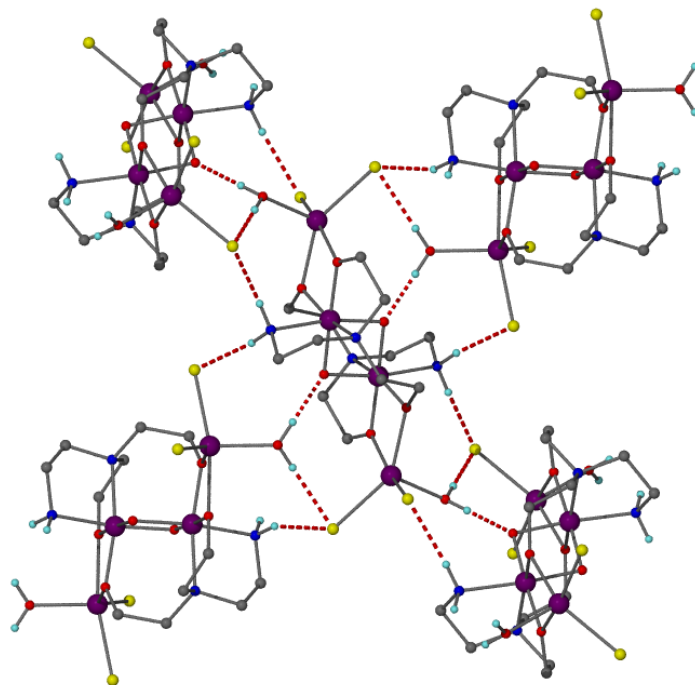

Fig. S2. The H-bonding around **2**. Most hydrogen atoms have been omitted for clarity.

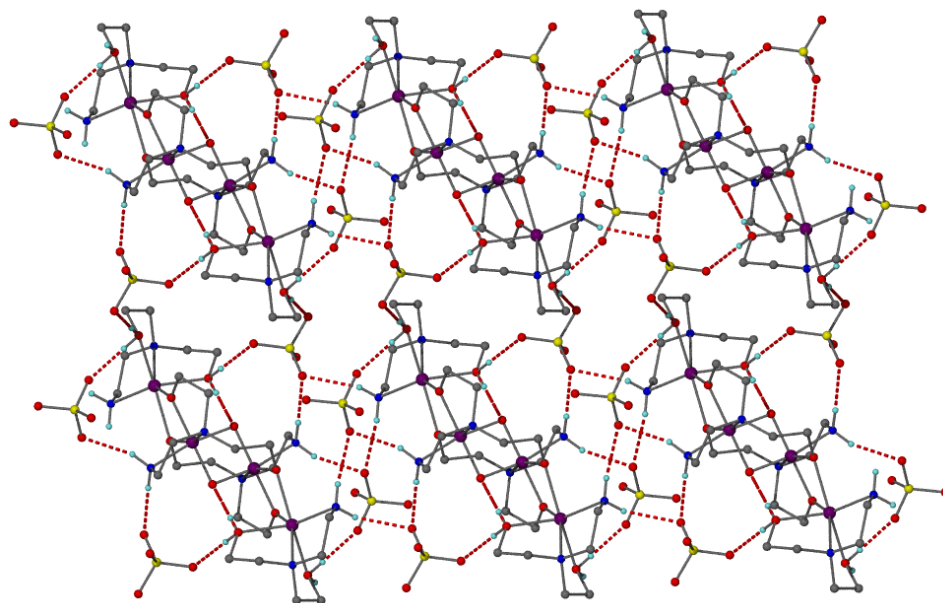

Fig. S3. The H-bonded layer in **3** parallel to the *ab* plane. Most hydrogen atoms have been omitted for clarity.

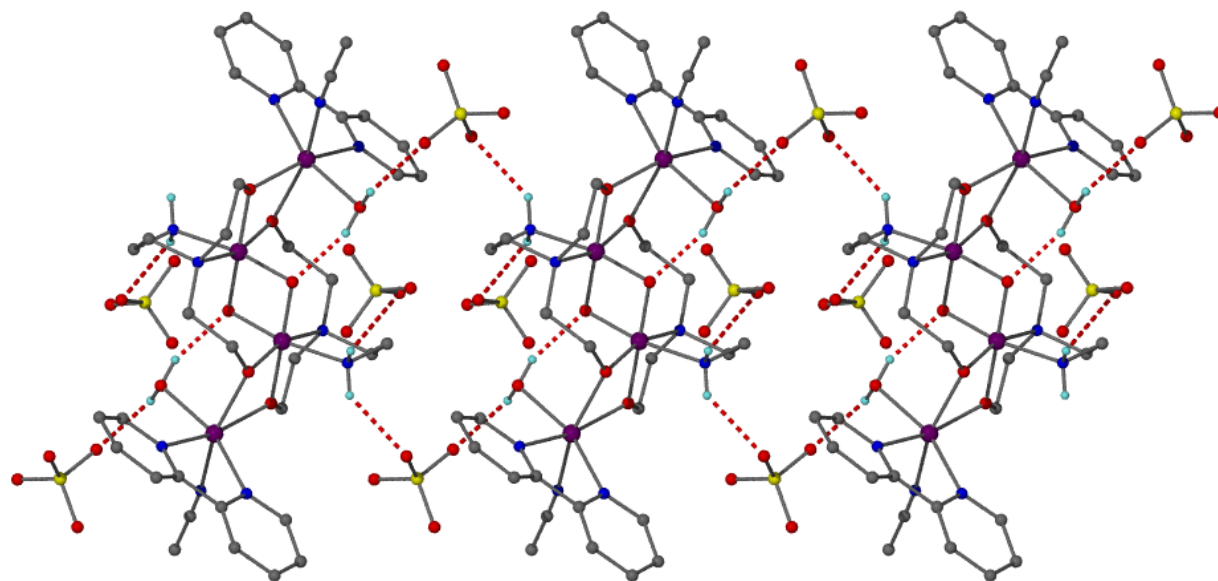

Fig. S4. The H-bonded chain in **4** along the *a* axis. Most hydrogen atoms have been omitted for clarity.

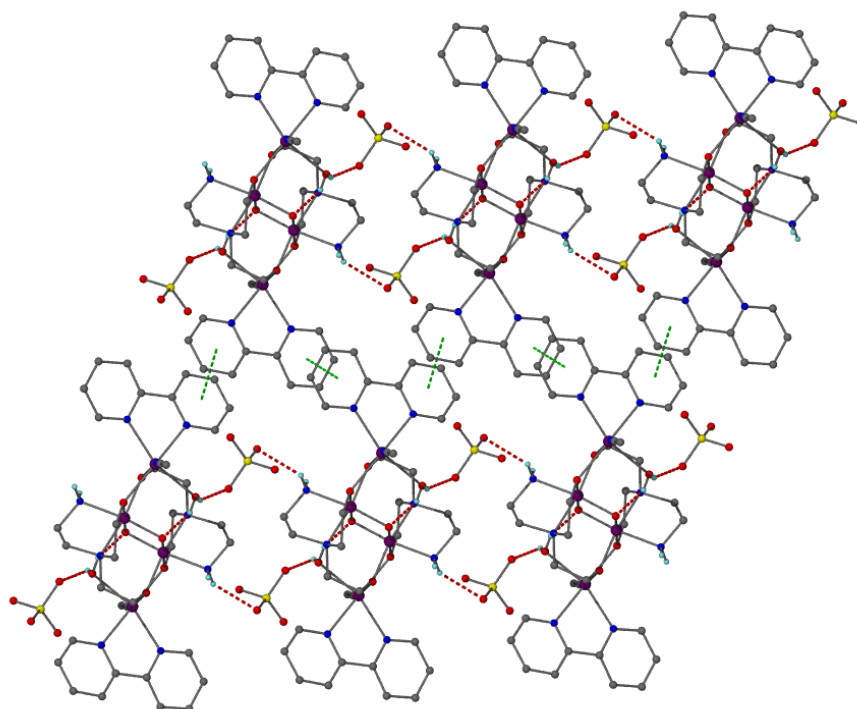

Fig. S5. The 2D layer in **4** parallel to the *ab* plane. Most hydrogen atoms and the singly H-bonded perchlorates have been omitted for clarity.

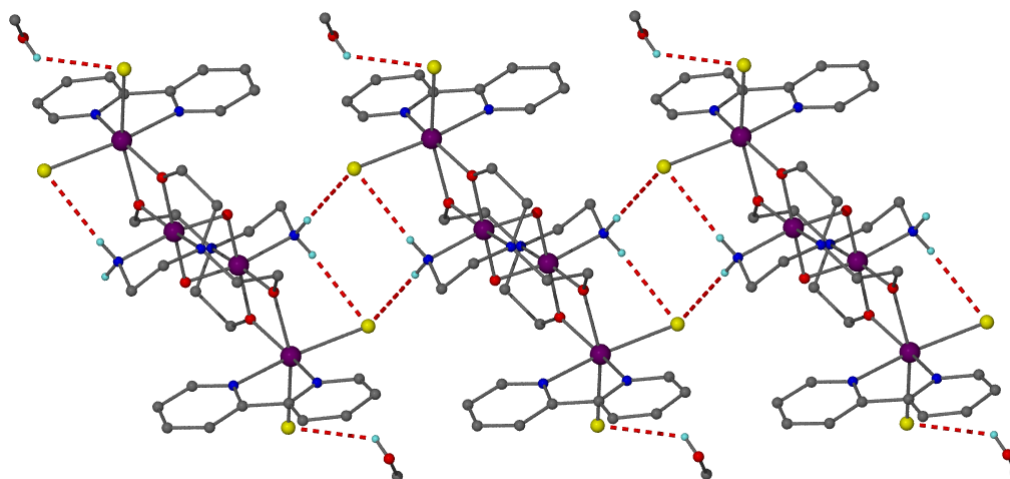

Fig. S6. The H-bonded chain in **5** along the *b* axis. Most hydrogen atoms have been omitted for clarity.

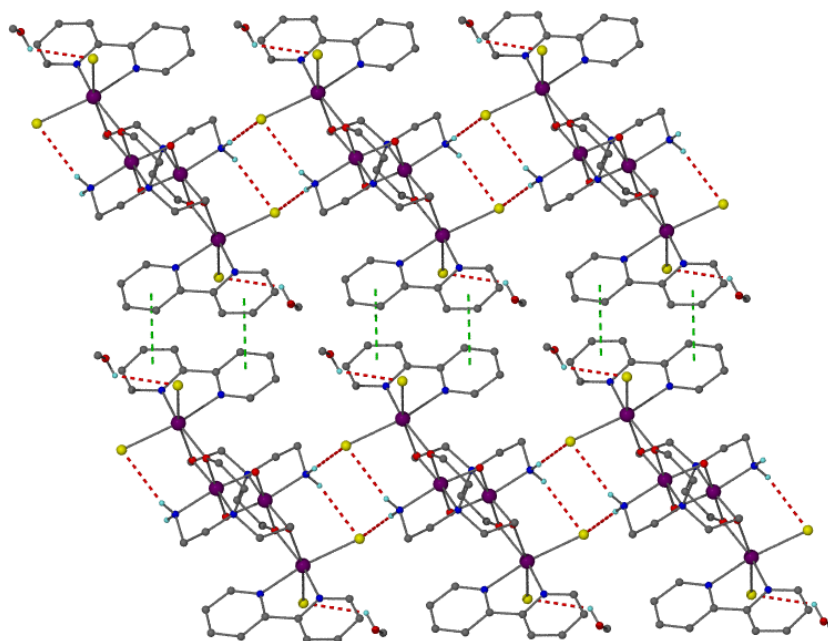

Fig. S7. The 2D layer in **5** parallel to the *bc* plane. Most hydrogen atoms have been omitted for clarity.

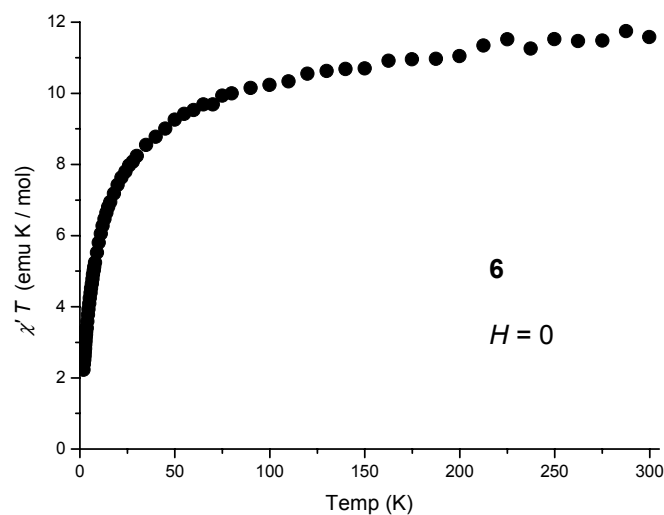

Fig. S8. For **6**, plot of the zero-field  $\chi'_m T$  vs.  $T$  obtained for an AC frequency  $f = 90$  Hz in the  $2 \text{ K} < T < 300 \text{ K}$  range. As for the other studied complexes, no evidence of phase transitions is found within this  $T$  range.

Table S1: Dimensions of the unique hydrogen bonds (distances in Å and angles in °) for  
 $[\text{Mn}^{\text{II}}_2\text{Mn}^{\text{IV}}_2\text{O}_2(\text{heed})_2(\text{EtOH})_6\text{Br}_2]\text{Br}_2$  (**1**)

| $\text{D}^{\text{a}}\text{-H}\cdots\text{A}^{\text{b}}$ | $\text{D}^{\text{a}}\cdots\text{A}^{\text{b}}$ | $\text{H}\cdots\text{A}^{\text{b}}$ | $\angle\text{D}^{\text{a}}\text{H}\text{A}^{\text{b}}$ |
|---------------------------------------------------------|------------------------------------------------|-------------------------------------|--------------------------------------------------------|
| O12-H9 $\cdots$ O1                                      | 2.732(3)                                       | 1.983(1)                            | 150.7(1)                                               |
| N231-H23 $\cdots$ Br2                                   | 3.483(1)                                       | 2.626(1)                            | 164.6(1)                                               |
| N231-H4 $\cdots$ Br2 [1-x, 1/2+y, 3/2-z]                | 3.491(1)                                       | 2.660(1)                            | 157.0(1)                                               |
| O13-H24 $\cdots$ Br1 [2-x, 2-y, 1-z]                    | 3.234(1)                                       | 2.427(1)                            | 167.9(1)                                               |
| O14-H28 $\cdots$ Br2 [x, 3/2-y, -1/2+z]                 | 3.275(1)                                       | 2.454(1)                            | 168.6(1)                                               |

<sup>a</sup> D = donor atom.

<sup>b</sup> A = acceptor atom.

Table S2: Dimensions of the unique hydrogen bonds (distances in Å and angles in °) for  
 $[\text{Mn}^{\text{II}}_2\text{Mn}^{\text{IV}}_2\text{O}_2(\text{heed})_2(\text{H}_2\text{O})_2\text{Cl}_4]$  (**2**)

| $\text{D}^{\text{a}}\text{-H}\cdots\text{A}^{\text{b}}$ | $\text{D}^{\text{a}}\cdots\text{A}^{\text{b}}$ | $\text{H}\cdots\text{A}^{\text{b}}$ | $\angle\text{D}^{\text{a}}\text{H}\text{A}^{\text{b}}$ |
|---------------------------------------------------------|------------------------------------------------|-------------------------------------|--------------------------------------------------------|
| N21-H21 $\cdots$ Cl13 [1/3+y, 2/3-x+y, 2/3-z]           | 3.308(1)                                       | 2.402(1)                            | 172.7(1)                                               |
| N21-H22 $\cdots$ Cl14 [1/3-x+y, 2/3-x, -1/3+z]          | 3.315(1)                                       | 2.447(1)                            | 159.7(1)                                               |
| O15-H15 $\cdots$ O12 [1/3+x-y, -1/3+x, 2/3-z]           | 2.601(1)                                       | 1.761(1)                            | 179.9(1)                                               |
| O15-H16 $\cdots$ Cl14 [1/3-x+y, 2/3-x, -1/3+z]          | 3.140(1)                                       | 2.299(1)                            | 179.9(1)                                               |

<sup>a</sup> D = donor atom. <sup>b</sup> A = acceptor atom.

Table S3: Dimensions of the unique hydrogen bonds (distances in Å and angles in °) for  
 $[\text{Mn}^{\text{II}}_2\text{Mn}^{\text{IV}}_2\text{O}_2(\text{heed})_2(\text{heedH}_2)_2](\text{ClO}_4)_4$  (**3**)

| $\text{D}^{\text{a}}\text{-H}\cdots\text{A}^{\text{b}}$ | $\text{D}^{\text{a}}\cdots\text{A}^{\text{b}}$ | $\text{H}\cdots\text{A}^{\text{b}}$ | $\angle\text{D}^{\text{a}}\text{HA}^{\text{b}}$ |
|---------------------------------------------------------|------------------------------------------------|-------------------------------------|-------------------------------------------------|
| N431-H4312 $\cdots$ O33 [x,1+y,z]                       | 3.168(1)                                       | 2.400(1)                            | 145.3(1)                                        |
| N431-H4311 $\cdots$ O54 [1-x,2-y,1-z]                   | 3.075(1)                                       | 2.302(1)                            | 145.4(1)                                        |
| N432-H4321 $\cdots$ O54                                 | 3.178(1)                                       | 2.298(1)                            | 170.2(1)                                        |
| N432-H4322 $\cdots$ O33 [1-x,1-y,1-z]                   | 3.066(1)                                       | 2.242(1)                            | 154.3(1)                                        |
| N432-H4322 $\cdots$ O43 [1-x,1-y,1-z]                   | 3.220(1)                                       | 2.448(1)                            | 145.6(1)                                        |
| O421-H4211 <sup>c</sup> $\cdots$ O1 [1-x,1-y,1-z]       | 2.798(1)                                       | 1.957(1)                            | 179.8(1)                                        |
| O421-H4212 <sup>c</sup> $\cdots$ O24 [1-x,1-y,1-z]      | 3.035(1)                                       | 2.196(1)                            | 179.5(1)                                        |
| O411-H4111 <sup>c</sup> $\cdots$ O44 [1+x,y,z]          | 2.812(1)                                       | 1.973(1)                            | 180.0(1)                                        |
| O411-H4112 <sup>c</sup> $\cdots$ O23 [1-x,1-y,1-z]      | 2.846(1)                                       | 2.006(1)                            | 179.7(1)                                        |

<sup>a</sup> D = donor atom.

<sup>b</sup> A = acceptor atom.

<sup>c</sup> The hydrogen atoms on O421 (H4211, H4212) and on O411 (H4111, H4112) appear in two positions with 50 % occupancy to satisfy H-bond formation requirements, respectively.

Table S4: Dimensions of the unique hydrogen bonds (distances in Å and angles in °) for  
[Mn<sup>II</sup><sub>2</sub>Mn<sup>IV</sup><sub>2</sub>O<sub>2</sub>(heed)<sub>2</sub>(bpy)<sub>2</sub>(MeCN)<sub>2</sub>(H<sub>2</sub>O)<sub>2</sub>](ClO<sub>4</sub>)<sub>4</sub> (**4**)

| D <sup>a</sup> -H <sup>⋯</sup> A <sup>b</sup> | D <sup>a</sup> ⋯A <sup>b</sup> | H <sup>⋯</sup> A <sup>b</sup> | <D <sup>a</sup> HA <sup>b</sup> |
|-----------------------------------------------|--------------------------------|-------------------------------|---------------------------------|
| O28-H281⋯O29 [1-x,-y,2-z]                     | 2.759(1)                       | 1.982(1)                      | 157.3(1)                        |
| N12-H121⋯O34                                  | 3.095(1)                       | 2.373(1)                      | 137.8(1)                        |
| N12-H122⋯O38 [1+x,y,z]                        | 3.027(1)                       | 2.291(1)                      | 140.3(1)                        |
| O28-H282⋯O39                                  | 2.966(1)                       | 2.217(1)                      | 150.9(1)                        |

<sup>a</sup> D = donor atom.

<sup>b</sup> A = acceptor atom.

Table S5: Dimensions of the unique hydrogen bonds (distances in Å and angles in °) for  
[Mn<sup>II</sup><sub>2</sub>Mn<sup>IV</sup><sub>2</sub>O<sub>2</sub>(heed)<sub>2</sub>(bpy)<sub>2</sub>Br<sub>4</sub>]·2MeOH (**5**·2MeOH)

| D <sup>a</sup> -H <sup>⋯</sup> A <sup>b</sup> | D <sup>a</sup> ⋯A <sup>b</sup> | H <sup>⋯</sup> A <sup>b</sup> | <D <sup>a</sup> HA <sup>b</sup> |
|-----------------------------------------------|--------------------------------|-------------------------------|---------------------------------|
| N26-H261⋯Br3                                  | 3.567(1)                       | 2.803(1)                      | 148.6(1)                        |
| N26-H262⋯Br3 [-x,2-y,1-z]                     | 3.521(1)                       | 2.669(1)                      | 172.1(1)                        |
| O29-H291⋯Br4                                  | 3.276(1)                       | 2.682(1)                      | 127.4(1)                        |

<sup>a</sup> D = donor atom.

<sup>b</sup> A = acceptor atom.

Table S6: Dimensions of the unique hydrogen bonds (distances in Å and angles in °) for  $\{[\text{Mn}^{\text{II}}_2\text{Mn}^{\text{IV}}_2\text{O}_2(\text{heed})_2(\text{H}_2\text{O})_2(\text{MeOH})_2(\text{dca})_2]\text{Br}_2\}_n$  (**6**)

| $\text{D}^{\text{a}}\text{-H}\cdots\text{A}^{\text{b}}$ | $\text{D}^{\text{a}}\cdots\text{A}^{\text{b}}$ | $\text{H}\cdots\text{A}^{\text{b}}$ | $\angle\text{D}^{\text{a}}\text{HA}^{\text{b}}$ |
|---------------------------------------------------------|------------------------------------------------|-------------------------------------|-------------------------------------------------|
| N12-H121 $\cdots$ Br24                                  | 3.621(1)                                       | 2.715(1)                            | 173.4(1)                                        |
| N12-H122 $\cdots$ Br24 [-x,1/2+y,1/2-z]                 | 3.570(1)                                       | 2.754(1)                            | 155.5(1)                                        |
| O14-H142 $\cdots$ Br24 [-x,1/2+y,1/2-z]                 | 3.250(1)                                       | 2.491(1)                            | 154.2(1)                                        |
| O16-H162 $\cdots$ O13 [-x,2-y,1-z]                      | 2.736(1)                                       | 2.017(1)                            | 145.9(1)                                        |

<sup>a</sup> D = donor atom.

<sup>b</sup> A = acceptor atom.

Table S7. Bond Valence Sum calculations for complexes **1-6**.

| Complex 1 |                    |                     |                    |      | Complex 2 |                    |                     |                    |      |
|-----------|--------------------|---------------------|--------------------|------|-----------|--------------------|---------------------|--------------------|------|
| Atom      | Mn <sup>(II)</sup> | Mn <sup>(III)</sup> | Mn <sup>(IV)</sup> | Ox.  | Atom      | Mn <sup>(II)</sup> | Mn <sup>(III)</sup> | Mn <sup>(IV)</sup> | Ox.  |
| Mn1       | 4.45               | 4.15                | 4.06               | (IV) | Mn1       | 4.43               | 4.13                | 4.04               | (IV) |
| Mn2       | 1.99               | 1.86                | 1.83               | (II) | Mn2       | 2.12               | 2.03                | 2.01               | (II) |
| Complex 3 |                    |                     |                    |      | Complex 4 |                    |                     |                    |      |
| Atom      | Mn <sup>(II)</sup> | Mn <sup>(III)</sup> | Mn <sup>(IV)</sup> | Ox.  | Atom      | Mn <sup>(II)</sup> | Mn <sup>(III)</sup> | Mn <sup>(IV)</sup> | Ox.  |
| Mn1       | 1.97               | 1.84                | 1.80               | (II) | Mn1       | 3.68               | 4.13                | 4.05               | (IV) |
| Mn2       | 4.46               | 4.16                | 4.07               | (IV) | Mn2       | 2.11               | 2.03                | 1.99               | (II) |
| Complex 5 |                    |                     |                    |      | Complex 6 |                    |                     |                    |      |
| Atom      | Mn <sup>(II)</sup> | Mn <sup>(III)</sup> | Mn <sup>(IV)</sup> | Ox.  | Atom      | Mn <sup>(II)</sup> | Mn <sup>(III)</sup> | Mn <sup>(IV)</sup> | Ox.  |
| Mn1       | 4.45               | 4.15                | 4.06               | (IV) | Mn2       | 4.47               | 4.17                | 4.08               | (IV) |
| Mn2       | 1.86               | 1.78                | 1.75               | (II) | Mn4       | 2.21               | 2.08                | 2.03               | (II) |
